# Supplementary material for: Identification and potential mechanisms of a 4-lncRNA signature that predicts prognosis in patients with laryngeal cancer
Source: PubMed Central journal article supplement (PMC6694645; doi:10.1186/s40246-019-0230-6), 2019-08-15

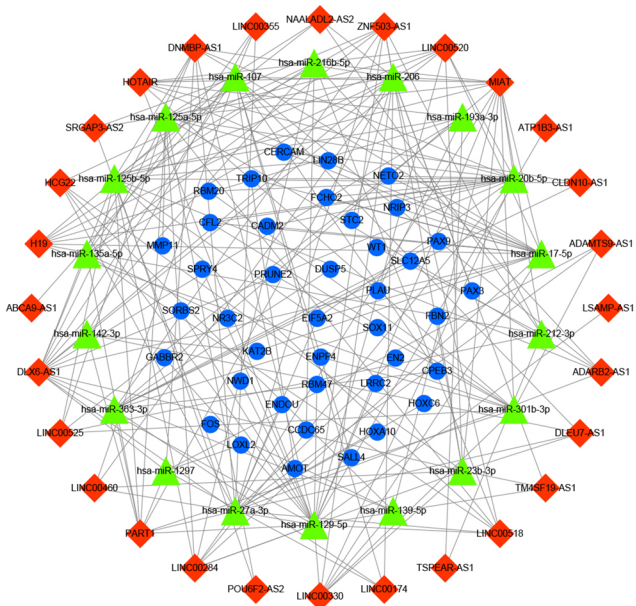

Supplement: 40246_2019_230_MOESM1_ESM.pdf [file 40246_2019_230_MOESM1_ESM.pdf]
